# Supplementary material for: Novel electrospun fibers as carriers for delivering a biocompatible Sm(iii) nanodrug for cancer therapy: fabrication, characterization, cytotoxicity and toxicity
Source: Royal Society of Chemistry journal article supplement (doi:10.1039/d2ra06052c), 2023-01-01
Supplement: d2ra06052c1.pdf [file d2ra06052c1.pdf]

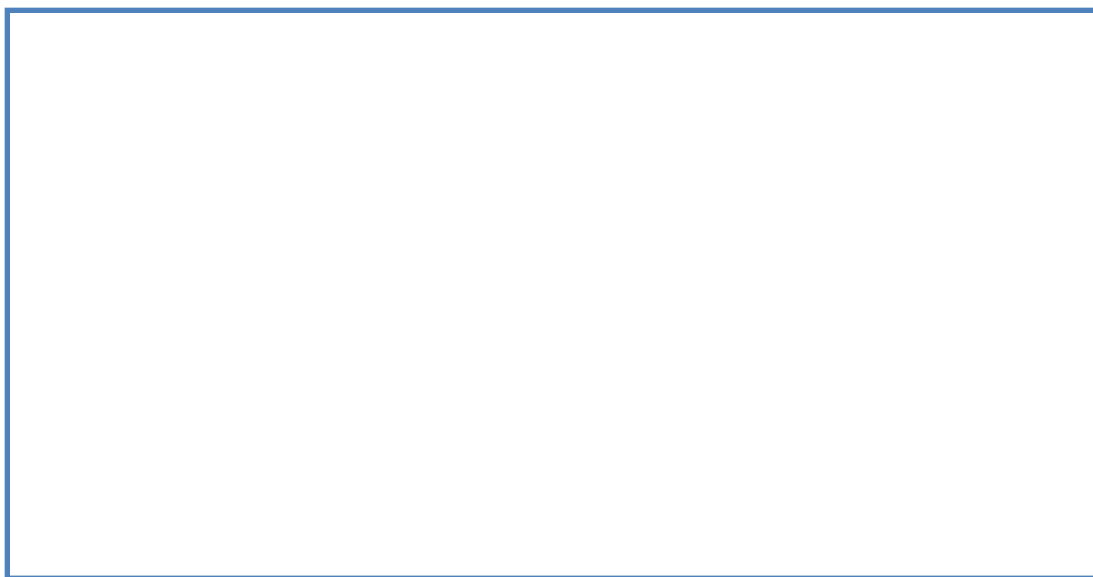

**Fig. S1.** Mass spectrum of Sm(III) nanocomplex

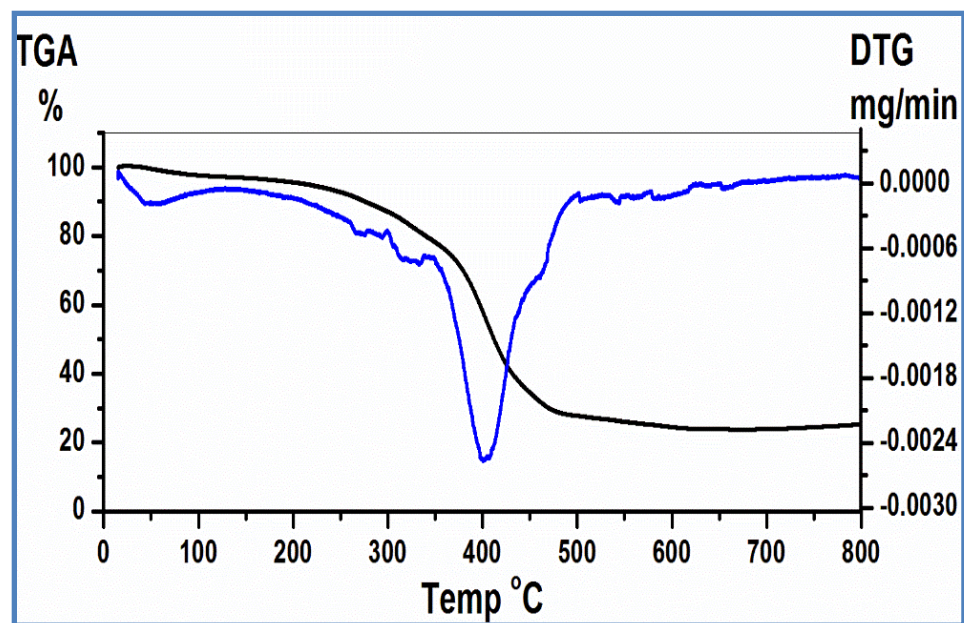

**Fig. S2.** TGA curve of Sm (III) nanocomplex
